# Supplementary material for: Digital PCR using micropatterned superporous absorbent array chips
Source: Royal Society of Chemistry journal article supplement (doi:10.1039/c6an00164e), 2016-01-01
Supplement: c6an00164e1.pdf [file c6an00164e1.pdf]

## Supporting Information

### Digital PCR Using Micropatterned Superporous Absorbent Array Chips

Y. Wang,<sup>a,b</sup> Kristopher M. Southard,<sup>a</sup> and Y. Zeng<sup>a,c\*</sup>

a. Department of Chemistry, University of Kansas, Lawrence, KS 66045.

b. Key Laboratory of Optoelectronic Chemical Materials and Devices, Jiangnan University, China

c. University of Kansas Cancer Center, Kansas City, KS 66160

\* Corresponding author: yongz@ku.edu;

#### Methods for microfluidic droplet digital PCR (ddPCR)

Fabrication and operation of the four-layer 4-channel microfluidic droplet generator chip was described in our previous work.<sup>1,2</sup> Prior to droplet generation, the glass channels were first treated with 0.1% solution of octadecyltrichlorosilane (OTS) in dry toluene for 30 min to render the channel surface hydrophobic. The carrier oil is a mixture of 39.9% (w/w) DC 5225C Formulation Aid (Dow Chemical Co., Midland, MI), 30% (w/w) DC 749 Fluid (Dow Chemical Co.), 30% (w/w) AR20 Silicone Oil (Sigma-Aldrich), and 0.1% (w/w) Triton X-100 surfactant (Sigma-Aldrich). The device was assembled with an aluminum manifold and connected with tubings for oil infusion and droplet collection. The carrier oil was injected continuously into the device by a syringe pump (Harvard Apparatus, Holliston, MA). The chip was pneumatically actuated with a constant pressure (30 kPa) and vacuum (-80 kPa) controlled by a homemade solenoid valve system to pump the aqueous solution through the channels. The pumping was conducted in a four-step fashion under the control of a program written in LABVIEW (National Instruments, Austin, TX). PCR mix contained 1x *Platinum*<sup>®</sup> *Taq* DNA polymerase buffer with 3 mM MgCl<sub>2</sub>, 0.2 mM dNTPs, 0.4 μg/μL heat-inactivated BSA, 0.01% Tween 80, 0.4 μM each of primers for λ-DNA, 0.15 U/μL *Platinum*<sup>®</sup> *Taq* DNA Polymerase, 1X EvaGreen dye, and λ-DNA samples (0.054 and 0.54 ng/mL). Three replicates were run for each λ-DNA standard, for which 30-μL PCR mix was used to generate monodispersed droplets which were collected in 0.5 mL PCR tubes. Thermal cycling was carried out with a 2 min hot start at 95 °C, and 40 cycles of 95 °C for 30 s, 60 °C for 30 s, 72 °C for 30 s in a Mastercycler<sup>®</sup> nexus thermocycler (Eppendorf). Fluorescence imaging analysis was conducted following the established method to measure the percentage of positive droplets.<sup>2,3</sup> ~11,000-14,500 droplets were imaged and the average droplet size was measured to be 74.8 ± 1.47 μm in diameter. The average concentration of λ-DNA standard and the expanded uncertainty were calculated following the approach described by Pinheiro, et al.<sup>3</sup>

**Table S1. Comparison of measurement accuracy and precision of  $\mu$ SAAC, microfluidic droplet system and commercial platforms for dPCR analysis**

| dPCR system                                           | QX100 <sup>3</sup>                            | BioMark <sup>3</sup>                          | Microfluidic ddPCR  | $\mu$ SAAC                      |
|-------------------------------------------------------|-----------------------------------------------|-----------------------------------------------|---------------------|---------------------------------|
| dPCR Format                                           | Droplet                                       | Microchamber array                            | Droplet             | Microwell array                 |
| Sample loading                                        | Automated injection                           | Automated injection                           | Automated injection | Pipetting & spontaneous filling |
| Partition number                                      | ~20,000                                       | 765                                           | ~11,000-14,500      | 2,500                           |
| DNA template                                          | $\lambda$ -DNA (NIM-001 plasmid) <sup>a</sup> | $\lambda$ -DNA (NIM-001 plasmid) <sup>a</sup> | $\lambda$ -DNA      | $\lambda$ -DNA                  |
| Relative standard uncertainty of partition volume (%) | 1.0 (0.8)                                     | 4.7 (0.7)                                     | 3.4                 | 2.9                             |
| Relative expanded uncertainty (%)                     | 3.2 (3.6)                                     | 13 (6.0)                                      | 3.7 <sup>b</sup>    | 7.0 <sup>b</sup>                |

a. The values in the brackets for the commercial instruments were obtained from Ref 4 for measuring the NIM-001 plasmid reference.

b. Relative expanded uncertainty obtained for the DNA standard of 0.54 ng/mL was listed.

**Reference:**

1. Y. Zeng, R. Novak, J. Shuga, M. T. Smith and R. A. Mathies, *Anal Chem*, 2010, **82**, 3183-3190.
2. Y. Zeng, M. Shin and T. Wang, *Lab Chip*, 2013, **13**, 267-273.
3. L. B. Pinheiro, V. A. Coleman, C. M. Hindson, J. Herrmann, B. J. Hindson, S. Bhat and K. R. Emslie, *Anal Chem*, 2012, **84**, 1003-1011.
4. L. Dong, Y. Meng, Z. Sui, J. Wang, L. Wu and B. Fu, *Sci Rep*, 2015, **5**, 13174
